# Supplementary material for: Tracking the Medication History of Persons With Serious Mental Disorders
Source: Atypon-hosted journal article supplement (doi:10.1176/appi.ps.20220369), 2022-08-19
Supplement: appi.ps.20220369.ds001.pdf [file appi.ps.20220369.ds001.pdf]

**The Adapted Medication Recommendation Tracking Form (MRTF)**

| <b>Date of visit</b> | <b>Medication Name</b> | <b>Dose/Unit</b> | <b>Any Adjustment at this visit?</b> | <b>Reason for the Adjustment</b> |
|----------------------|------------------------|------------------|--------------------------------------|----------------------------------|
| 1/1/2020             | Citalopram             | 20mg             | new med                              | persistent symptoms (depression) |
| 1/1/2020             | Quetiapine             | 300mg            | increase                             | persistent symptoms (depression) |
| 2/5/2020             | Citalopram             | 0mg              | stopped                              | trigger mixed episode symptoms   |
| 2/5/2020             | Quetiapine             | 200mg            | decrease                             | worsen side effect (fatigue)     |
| 2/5/2020             | Abilify                | 2mg              | new med                              | persistent symptoms (depression) |
| 3/15/2020            | Quetiapine             | 200mg            | no                                   | improved symptoms                |
| 3/15/2020            | Abilify                | 2mg              | no                                   | improved symptoms                |
